# Supplementary material
Source: MDPI journal article supplement (https://www.mdpi.com/2073-4433/12/2/250)

### Supplementary Materials:

**Figure S1.** A polar plot of the hourly variations in wind speed (round radius, in m/s) and direction (angles) to surface PM<sub>2.5</sub> concentration anomaly (color contours, in  $\mu\text{g}/\text{m}^3$ ) of second eigenvector of YC in 2020

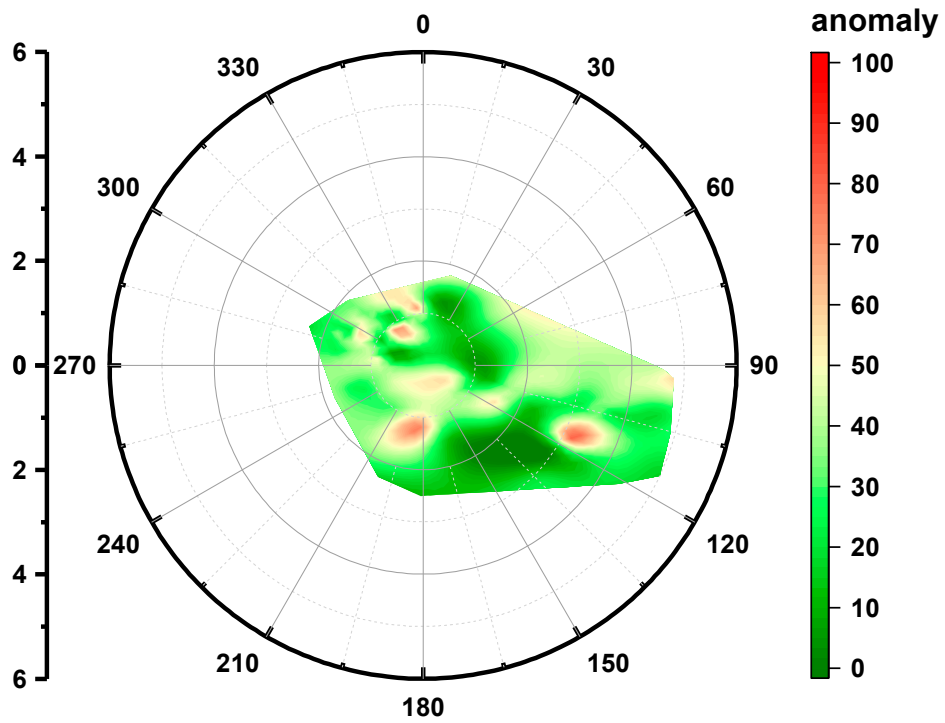

Supplement: s1 [file s1]
